# Supplementary material
Source: PubMed Central journal article supplement (PMC5574042)
Supplement: MCB.00154-17_zmb999101591s1.pdf [file MCB.00154-17_zmb999101591s1.pdf]

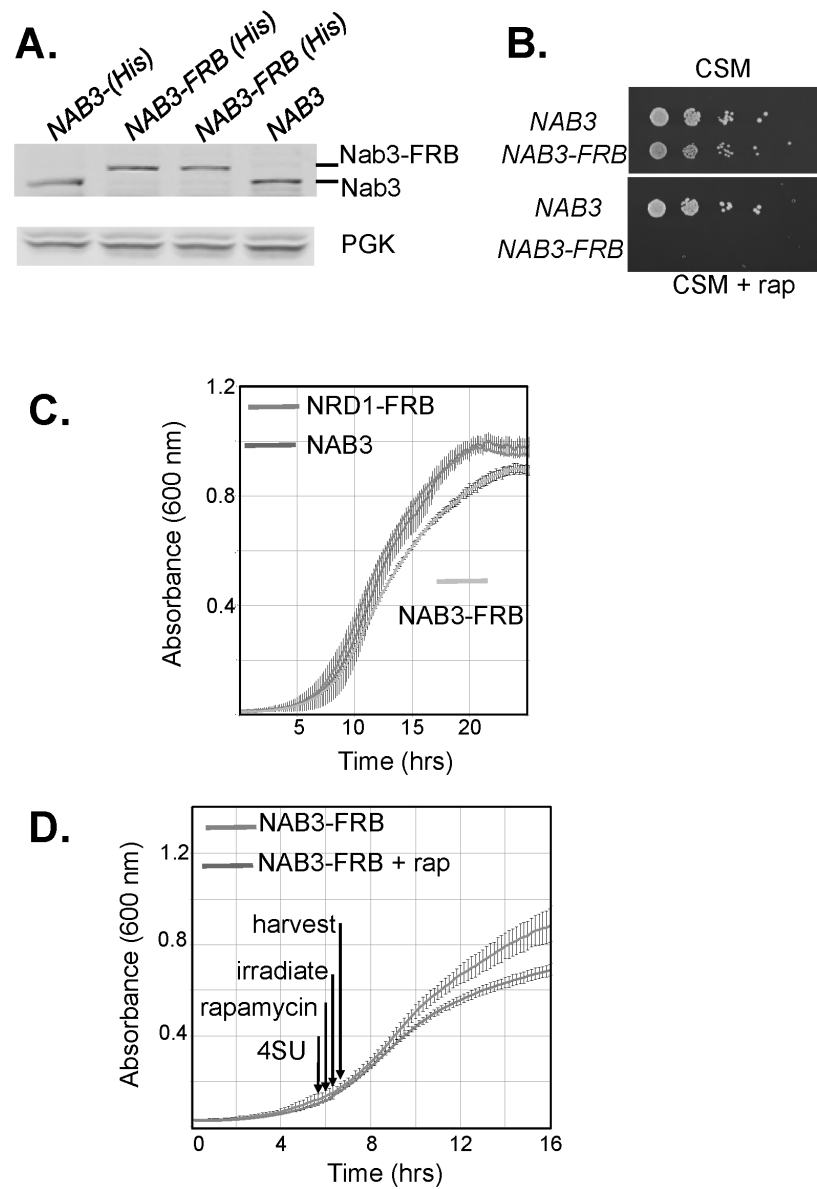

**Figure S1.** Growth properties of *NAB3-FRB*, *RPB2-HTB*. **(A)** *NAB3-FRB* protein expression. **(B)** *NAB3-FRB* and control strain grown with or without rapamycin. **(C)** Growth curves of FRB tagged Nrd1 and Nab3 compared to WT. **(D)** Growth curve of Nab3-FRB grown in the presence or absence of rapamycin. Arrows indicate the timing of labelling, irradiation and harvesting.

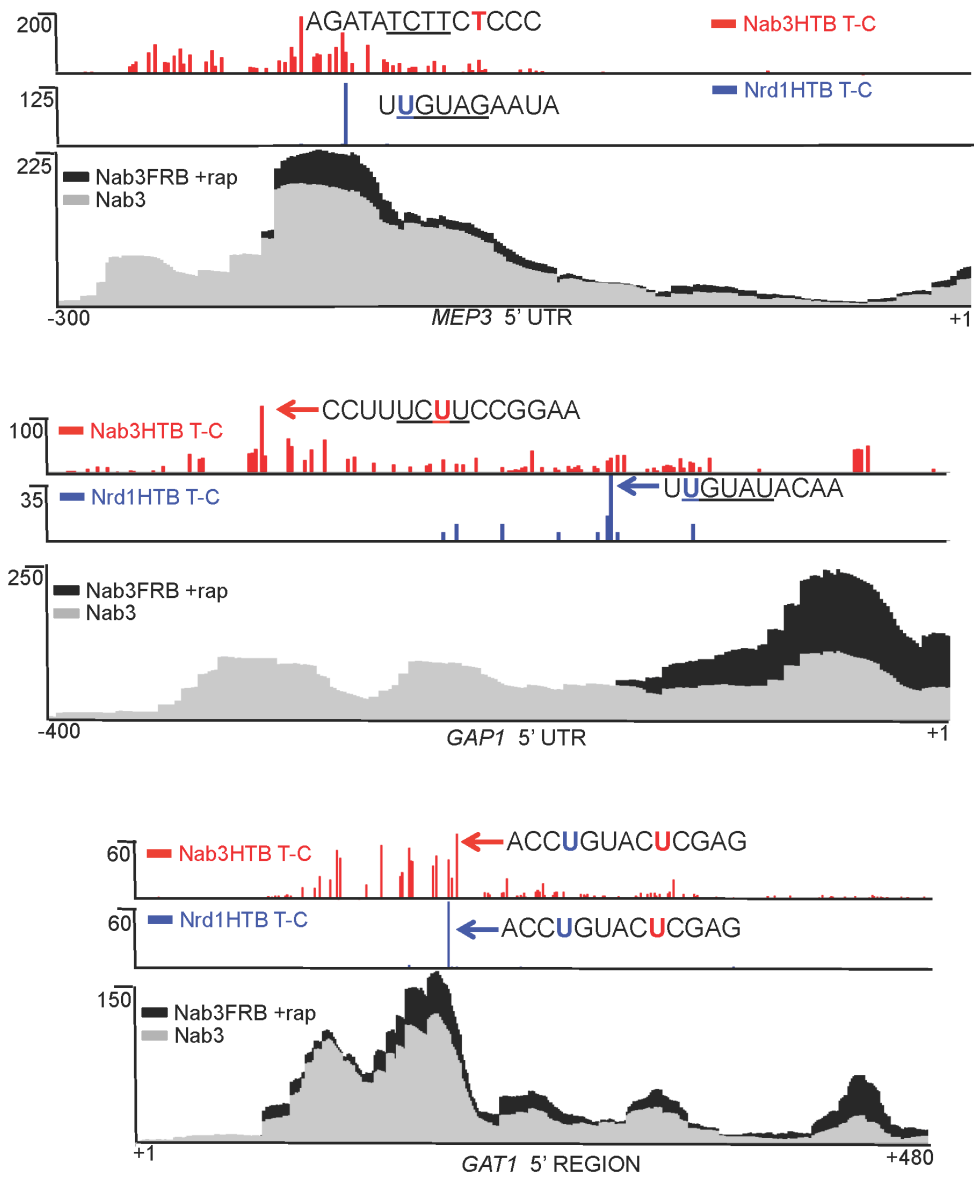

**Figure S2.** Increased expression of nitrogen catabolite repressed genes. Pol II and Nab3 binding maps showing examples of Nab3 regulated NCR genes.

| Gene    | 41 nt sequence centered on T to C change                                         | reads |
|---------|----------------------------------------------------------------------------------|-------|
| MEP3    | acaauuugauagauau <u>ucuu</u> ccccuuuccu <u>ucuu</u> guagaa                       | 474   |
| DIP5    | aggaaaaaagaacuaaacuc <u>ua</u> aguaaugaagaugccucua                               | 434.5 |
| YGK3    | acauguuuaccggauagcuc <u>ug</u> cuaccaguuuaaaacugu                                | 364   |
| DIP5    | guagaugcacucgaguau <u>ucuu</u> gggagaacguaacuuguauu                              | 357   |
| MEP3    | ua <u>ucuu</u> cuccuuuccu <u>ucuu</u> guagaauaagguugugugc                        | 342.5 |
| NRK1    | aucugacauaaaaagauuuc <u>ug</u> aaguuauucgucagauaaga                              | 310   |
| DIP5    | cuuggagaacguaacuugua <u>uug</u> agcuagagugcuggauaa                               | 297.5 |
| GLT1    | uacuacgcagacggauacuc <u>uc</u> aguugc <u>ucuuucuu</u> ccccu                      | 283.5 |
| GAP1    | guuggggcaacacaccuu <u>ucuu</u> ccggaaauucgcucuggaug                              | 244.5 |
| MEP3    | ugcagcacggacuucccuc <u>uc</u> cuug <u>ucuu</u> aucgca <u>ucuu</u> a              | 242.5 |
| GLT1    | aacacaccaaacuaaucguc <u>uc</u> ccacaucauaggaagauagg                              | 239   |
| GLT1    | auacucucaguugc <u>ucuuucuu</u> ccccu <u>ucuu</u> uuagcuaau                       | 237.5 |
| YGK3    | auagucugugugaccuau <u>uc</u> guuuacguaaagau <u>ucuu</u> g                        | 205.5 |
| MEP2    | gcucacgcaucgacgaauac <u>ua</u> agcggcgugaagaccucgu                               | 193   |
| GDH2    | caaaaguuauacugucgaca <u>uca</u> acacugacaagcguuuac                               | 178   |
| SLX9    | cguagcgaacaauaggcauuc <u>ug</u> gacgagaguuauagacauag                             | 168   |
| MEP2    | cgugaagaccucugugccuu <u>uca</u> auagaaguauucaguacaa                              | 167   |
| YGK3    | uacguaaagau <u>ucuu</u> guc <u>uc</u> aaaugcaagcuuaggguu                         | 165.5 |
| GDH2    | uguuuagucagaa <u>ucuu</u> gu <u>u</u> auauaagaacaaccgguuuc                       | 164.5 |
| AVT1    | gcucugagguucacuaua <u>uc</u> cauuccauugaacagaggu                                 | 163.5 |
| MEP1    | aacugcaguacggau <u>ucuu</u> a <u>u</u> acuguaaaacuauggagag                       | 158   |
| PRB1    | gacgaugaugaggagccauc <u>ug</u> acucugaagauaaagaaca                               | 157.5 |
| GDH2    | cuguuuagucagaa <u>ucuu</u> gu <u>u</u> auauaagaacaaccgguuu                       | 152.5 |
| GLN1    | ugauucuaauaauacgaa <u>uc</u> aggcuugguugguucguag                                 | 151   |
| GLN1    | gg <u>ugua</u> aguaaguaggcuuga <u>ua</u> augaaauaaagauagacucc                    | 148   |
| UGA1    | guaaaaauaagugaguaa <u>uc</u> gcggga <u>ugua</u> augauuuua                        | 147   |
| AVT1    | uacguauucuguaa <u>uc</u> gaa <u>u</u> uccgagacgcaaaugccuga                       | 144.5 |
| YLR257W | cacuuauuuuuuagagguuc <u>uc</u> ua <u>u</u> ucgucagugauagaaa                      | 142   |
| AGP1    | ugauggucugcccacaacaa <u>u</u> guagaacaaguuuuuuuangu                              | 141   |
| DAL3    | aaucgc <u>ucuu</u> gaugcuua <u>ucuu</u> guagggcaaaaa <u>ucuu</u> ug              | 140.5 |
| AVT1    | uuacguagacuuacguauuc <u>ug</u> uaa <u>u</u> acugauuccgagacg                      | 138.5 |
| YLR257W | gguc <u>ucuu</u> aguauuugcguc <u>ug</u> aaaagau <u>ucuu</u> agcucuguc            | 135.5 |
| GAT1    | aagaaaucugggaccugua <u>uc</u> gagcgcccagaaaauuuug                                | 135   |
| UGA4    | gaauacggcuuac <u>ucuu</u> gaa <u>ua</u> acaaauugcauauuuuaa                       | 134.5 |
| CAN1    | <u>ucuu</u> cagac <u>ucuu</u> aacucc <u>ugua</u> aaaaacaaaaaaaaaaaa              | 134.5 |
| MEP1    | cauaacugcaguacggau <u>ucuu</u> auacuguaagaaacuaugga                              | 133   |
| AGP1    | aaugucgucgucgaagucuc <u>ua</u> acgaacugaaagacuuga                                | 131.5 |
| PUT1    | caaguccguagcagc <u>ucuu</u> <u>ucuu</u> uug <u>ucuu</u> uuauauauca               | 127.5 |
| UGA4    | auagcgaauacggcuuac <u>ucuu</u> gaa <u>ua</u> acaaauugcauauau                     | 126   |
| CAN1    | agu <u>ucuu</u> cagac <u>ucuu</u> aac <u>uc</u> cu <u>ugua</u> aaaaacaaaaaaaaaaa | 125.5 |
| GAP1    | aacacaccuu <u>ucuu</u> ccggaa <u>u</u> ucgcucuggaugagacauau                      | 124   |
| SLX9    | gagaguuauagacauagaau <u>ug</u> auccaagggccuuucugca                               | 123.5 |
| LAP4    | auagagccgaucaagaa <u>ucuu</u> agugcaauuguagaaaccu                                | 121   |
| DAL7    | aagcuuggacaacacugcuc <u>ua</u> acgcagacaucgacacga                                | 119.5 |
| GAP1    | cuuccggaaucgcucugga <u>ug</u> agacauauaaagaugaagg                                | 119.5 |
| ARG4    | gucagacggcacucaaaa <u>uc</u> auggggugggagauucacug                                | 116   |
| AGP1    | gugcuuug <u>ucuu</u> ugaugguc <u>ug</u> cccacaacaanguagaaca                      | 113.5 |
| MEP2    | auugcucacgcaucgacgaa <u>ua</u> cuuagcggcgugaagacc                                | 112.5 |

|         |                                                                             |       |
|---------|-----------------------------------------------------------------------------|-------|
| MEP1    | gau <u>ucuu</u> auacuguaaaa <u>u</u> auggagagucgaacuacagg                   | 110   |
| GAT1    | cacgaacagagucccgaacc <u>ucg</u> accggacuugaauuuua                           | 109   |
| YLR257W | gaaaaga <u>ucuu</u> agcucug <u>ucuu</u> ugacucuaucacuuaauuuu                | 108   |
| SLX9    | aucugauccaagggccuuuc <u>ug</u> caccaaccuaaagaaacua                          | 104.5 |
| GAT1    | aaccucgaccggacuuga <u>uu</u> uaaacaagaaucuggga                              | 103.5 |
| GLN1    | ucaaauuuuacaaaaauauc <u>u</u> agaacuggaccaaagaggua                          | 101   |
| DAL3    | cg <u>ucuu</u> gaugcuua <u>ucuu</u> g <u>u</u> agggcaaaaa <u>ucuu</u> ugaag | 98    |
| UGA1    | guauaagcaagcgccagauc <u>u</u> guuuac <u>u</u> guaaaauuaagug                 | 98    |
| NRK1    | uuagcaccugaguauauauc <u>u</u> gacauaaaaagauuucugaa                          | 97    |
| ECM38   | acuucucaauuuauaa <u>ucuu</u> ccguaaaguucgaucguga                            | 96.5  |
| DAL3    | <u>ucuu</u> guagggcaaaaa <u>ucuu</u> ugaagcaagauaugguga                     | 93.5  |
| PUT1    | gcugggaaccgaacacaaac <u>ucc</u> acaaguccguagcagcuc                          | 92    |
| LAP4    | augcuaacugagagccauc <u>u</u> aaaaauaaccaaaucgcca                            | 89.5  |
| CAN1    | uucagagu <u>ucuu</u> cagacu <u>ucuu</u> aacucc <u>u</u> guaaaaaacaaaa       | 88    |
| NPR2    | ggaacugggaguaaucguauc <u>ucg</u> gaaauacauagaggugcg                         | 88    |
| MIG2    | ucacgcuaagacuauugacc <u>ucg</u> gagaacaaacaaaauuaaa                         | 87.5  |
| UGA1    | gugauugggauaugauuuguc <u>ucc</u> aguaguauaagcaagcgc                         | 87    |
| AAH1    | cuugcauuuggaagguacuc <u>u</u> agaaccugaccuauuguucc                          | 87    |
| PUT1    | ccgaacacaaacuccacaag <u>ucc</u> guagcagc <u>ucuuucuuu</u>                   | 84    |
| NRK1    | guuaucgucagauaagaaga <u>ugg</u> agucaaaa <u>u</u> guaaacaa                  | 84    |
| BAT2    | ucccucucugacacc <u>ucuu</u> g <u>u</u> uaucauucuguaaguccga                  | 83.5  |
| DAL7    | ccuuccaaaacuacuguaagc <u>ug</u> auuuuuuacaaaagauc                           | 80.5  |
| DAL7    | auaggcacgguaaagagc <u>u</u> gaacaauuggugaagauaagc                           | 79.5  |
| LAP4    | aucaguaa <u>ucuu</u> agugcaau <u>u</u> guagaaaccugcacaaccaa                 | 79.5  |
| GUD1    | uuacuauaaauaccauugauc <u>u</u> caaguccacuaagc <u>ucuu</u> gg                | 78.5  |
| OPT1    | uauggacaaucaucggaagc <u>ug</u> ugua <u>ucuu</u> gguaaaaagu                  | 76.5  |
| GUD1    | uagaucacgauaguagcuua <u>uc</u> accagaggauucacggug                           | 74.5  |
| UGA4    | uagcgaauacggcuuac <u>ucuu</u> gaauaacaaaugcauauua                           | 74.5  |
| MIG2    | aaauaaguuuuaacucacgc <u>u</u> aagacuauugaccucgagaa                          | 74.5  |
| PRB1    | aaacaaacuaaacuaauuc <u>u</u> aacaagcaagauagaaguua                           | 73    |
| MIG2    | uguguaagcuua <u>ucuu</u> aacuc <u>u</u> caauuaaguuuuaacucacg                | 69.5  |
| ARG4    | gcaaacauugcagacggc <u>uc</u> aaaaacuauggggugggag                            | 68.5  |
| DAL80   | aaaccgauccgggcuuauc <u>ucg</u> cugcauugggcggcauc                            | 67    |
| OPT1    | cgacuauauauggacaauca <u>ucg</u> gaagcugugua <u>ucuu</u> gg                  | 66.5  |
| OPT1    | cugcaagggcagucgauggg <u>uc</u> u <u>u</u> gaaacgccuagcaauc                  | 66    |
| DAL80   | uuguggcggcaucccuggac <u>u</u> gaaucagcaaguguugcuu                           | 66    |
| PRB1    | ucggugcccuagggagcauc <u>uc</u> ugcugcuuuggucauccca                          | 65.5  |
| ARG4    | cagacggcacucaaaaacua <u>u</u> ggggugggagauucacuggu                          | 65    |
| GUD1    | guuuagaucacgauaguagc <u>u</u> uauaccagaggauucacg                            | 64    |
| ECM38   | cuuccugaugcacaguu <u>ucuu</u> aaauaauagaauaaaaagc                           | 62.5  |
| BAT2    | cucugacacc <u>ucuu</u> guuauc <u>u</u> aaucuguaaguccgac <u>ucuu</u>         | 61.5  |
| PUT2    | cuuacugagggcuuccuuga <u>ug</u> aaauucaaaag <u>ucuu</u> cuu                  | 60    |
| DAL80   | uuuc <u>ucuu</u> ggguuu <u>ucuu</u> uc <u>u</u> gagacaguaauuuuugua          | 60    |
| CPS1    | cagaaca <u>ucuu</u> cuuguuauc <u>uc</u> agccucgccaccuuaucu                  | 57    |
| ECM38   | uguugcacaguu <u>ucuu</u> aaa <u>u</u> aaugaauaaaaagcuaacg                   | 57    |
| GDH3    | cuggaaauggcucagaauuc <u>u</u> caaaaaguaacuuggacugc                          | 56    |
| PUT2    | cuuaaaagacugggacuua <u>uc</u> gagggcuuccuugaugaaau                          | 53    |
| BAT2    | cccucucugacacc <u>ucuu</u> gu <u>u</u> aucuaauc <u>u</u> gaaagauccgac       | 52    |

**Table S1.** DNA sequences from Nab3 cross-linked sites used to determine binding motifs.

| <b>Nab3 Only</b> | <b>Nrd1 Only</b> | <b>Both</b> |
|------------------|------------------|-------------|
| BAG7             | ARO4             | AGP3        |
| DAK2             | BIO5             | ATG19       |
| DAL1             | BUD9             | CRF1        |
| FLO5             | CTS1             | DAL80       |
| MEP3             | DIP5             | DSE4        |
| MET13            | EGT2             | DUR1,2      |
| MET3             | HRP1             | FRE4        |
| MET6             | OPT1             | GAP1        |
| NRK1             | PBI1             | GLT1        |
| OLE1             | PCL9             | HEM25       |
| OPT2             | PRY3             | HMS1        |
| PHD1             | SCW11            | IMD2        |
| RGT1             | SEN1             | IMD3        |
| SAM2             | SET6             | IZH4        |
| STE23            | SVL3             | MEP2        |
| TOS2             | TIR4             | MKK2        |
| YCR101C          | YDL183C          | MTO1        |
| YDR124W          | YHL026C          | NRD1        |
| YGK3             | YKL183C-A        | PTR2        |
| YJL213W          | YKR015C          | REF2        |
| YLR053C          |                  | SPO23       |
| YNR066C          |                  | SUL2        |
|                  |                  | TDA4        |
|                  |                  | UGA4        |
|                  |                  | URA10       |
|                  |                  | URA8        |

**Table S2.** List of genes upregulated in Nab3 nuclear depletion only, Nrd1 nuclear depletion only, and in both. The genes selected were upregulated in all cases by at least 2 fold with p values < 0.05. This list was used to generate the venn-diagram in Figure 3B.
